# Supplementary material
Source: PubMed Central journal article supplement (PMC3585072)
Supplement: supp_M112.403311_jbc.M112.403311-1.pdf [file supp_M112.403311_jbc.M112.403311-1.pdf]

## Supplementary Figure Legends

**Fig. S1. Optimization of the *in vivo* crosslinking protocol for  $\alpha$ Syn.** **A.** Incubation at 37 °C improves  $\alpha$ Syn crosslinking efficiency. HEL cells were treated with DMSO alone (-) at 37 °C or with DSG at 37 °C or room temperature (RT) for 30' or 60' (min). TX-100 total protein lysates (centrifuged at 213,000g) were blotted with 15G7 mAb. Identical exposures of the same blot are shown. **B.** DSG at 1-2 mM is suitable for crosslinking  $\alpha$ Syn in living HEL cells. HEL were treated with DSG at 1, 2, or 5 mM (crosslinking solution volume ~10-20 fold cell pellet volume) at 37 °C, and reactions were quenched after 30 min. High-speed cytosols (213,000g) were blotted with  $\alpha$ Syn mAb (15G7; right panel) and DJ-1 pAb as a control for crosslinking efficiency (middle panel). Ponceau staining of the blot is also shown (left panel). **C.** Incubation of PVDF membranes in 0.4% paraformaldehyde (PFA) after transfer improves the detection of monomeric  $\alpha$ Syn. HEL cells treated *in vivo* with DMSO alone (-) or 1 mM DSG (+) were lysed in PBS/PI and centrifuged at 20,000g. After sample transfer, one part of the blot was incubated for 30 min in PBS/0.4% paraformaldehyde (+), while the other part (-) was incubated in just PBS. Blots were then probed with  $\alpha$ Syn mAb 15G7.

**Fig. S2. Co-immunoprecipitation (co-IP) of differently tagged  $\alpha$ Syn molecules after co-expression and crosslinking.**  $\alpha$ Syn-mycHis and  $\alpha$ Syn-V5 were either expressed separately in two different cell populations and mixed before crosslinking (M) or co-expressed in the same cell population and then mixed with mock-transfected cells (C). After *in vivo* crosslinking, lysates were subjected to FLAG-immunoprecipitation. Starting materials ('lysate') and anti-FLAG immunoprecipitations ('IP M2') were analyzed by WB using specific antibodies for the V5-epitope, the FLAG-epitope (M2), and  $\alpha$ Syn (15G7) (upper panels). IP purity was demonstrated by the absence of UCH-L1, 14-3-3, or Calmodulin immunoreactivity (lower panels) in the IP lanes. Asterisks mark IgG light and heavy chains.

**Fig. S3. Optimization of the *in vitro* crosslinking protocol for  $\alpha$ Syn.** **A.**  $\alpha$ S-80 is sensitive to vigorous sonication. High-speed (213,000g) HEL cytosols were sonicated for the indicated times and then normalized to 2  $\mu$ g/ $\mu$ L for loading (no significant loss of total protein content was detected by BCA assay). Crosslinking of these pure cytosols was carried out similarly to the protocol for crude cell lysates (see Fig. 5B). Blots for DJ-1 and  $\alpha$ Syn (15G7 mAb) are shown. **B.** Pure recombinant human  $\alpha$ Syn (rec.  $\alpha$ S) can contribute to the  $\alpha$ S-80 species when spiked into a HEL cell lysate before *in vitro* crosslinking. High-speed (213,000g) HEL cytosols were generated, and total protein was normalized to 1.2  $\mu$ g/ $\mu$ L. Then, rec.  $\alpha$ Syn (lanes marked +) was added at a ratio of 0.7 ng rec.  $\alpha$ Syn/ $\mu$ g cytosolic protein. Equal volumes of PBS alone were added to control samples (-). Crosslinking of all these cytosols was then conducted as before (see Fig. 5B). The rec.  $\alpha$ Syn contained small amounts of apparent LDS-stable dimers ( $\alpha$ S-30). Note that monomer levels ( $\alpha$ S-14) are underestimated, as these blots were not treated with 0.4% PFA (see Fig. S1C). Identical exposures of the same blot are shown; film was cut at white lines. **C.** *In vivo* and *in vitro* patterns of  $\alpha$ Syn crosslinking are independent of lysis method. DSG crosslinking of HEL cells *in vivo* or crude lysates *in vitro* was performed as before (see Fig. 5B). Vehicle (DMSO) served as control. Cell lysis was carried out by snap-freezing cells in liquid nitrogen (LN<sub>2</sub>) or by 15 sec sonication (son.). Lysis buffer was plain PBS (-PI) or PBS plus protease inhibitor mix (+PI). Of note, DMSO-only incubations without PI (first two lanes) caused a reduction in  $\alpha$ Syn signal, presumably due to degradation.

# Supplementary Figures

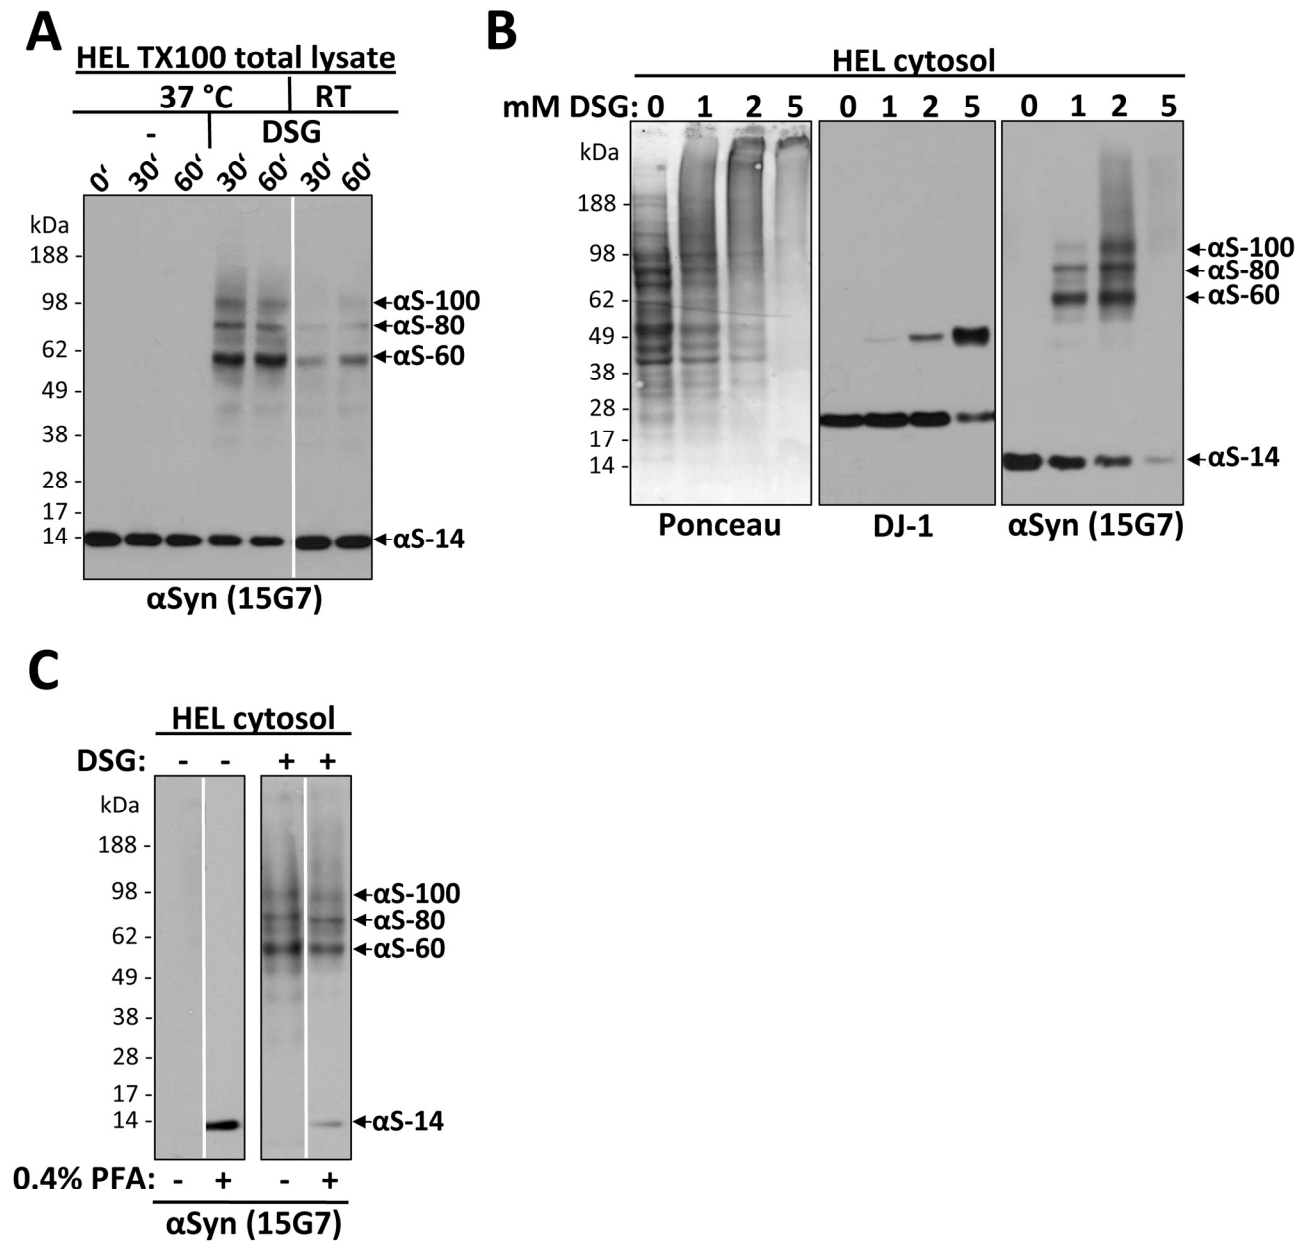

Fig. S1

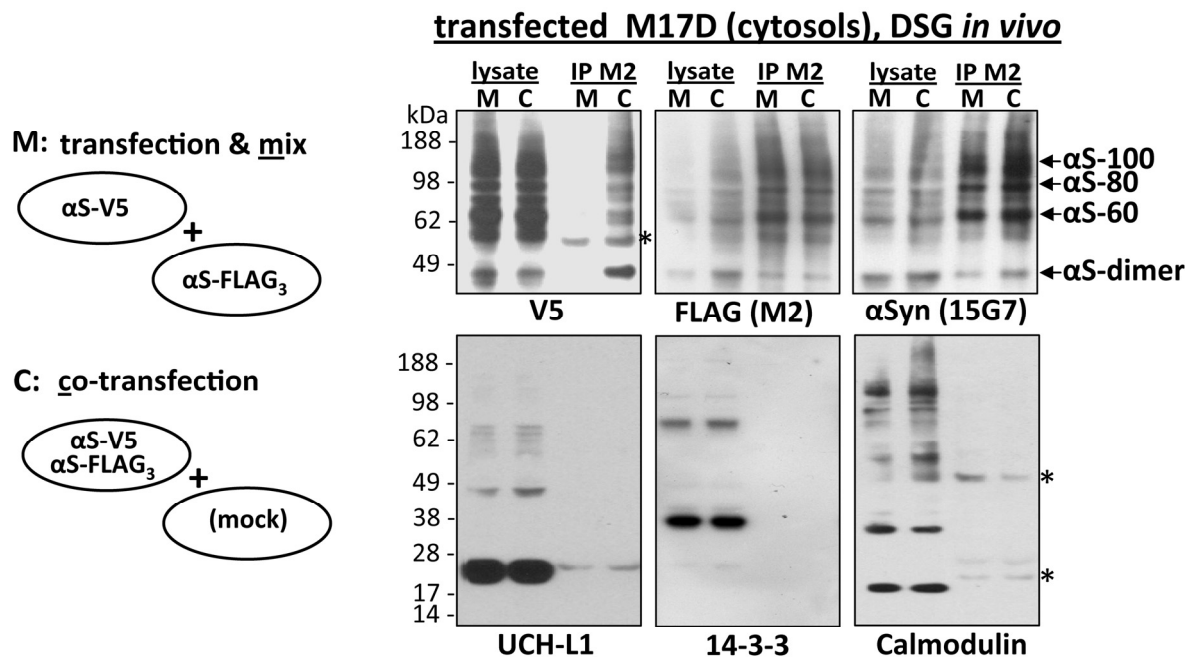

**Fig. S2**

**A**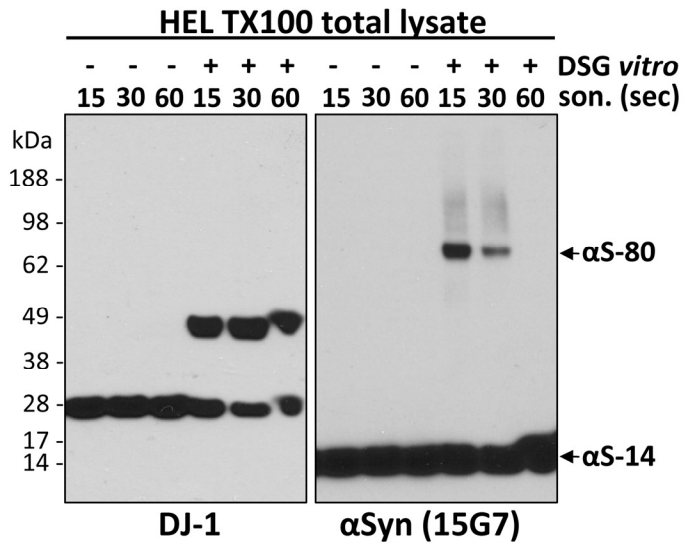**B**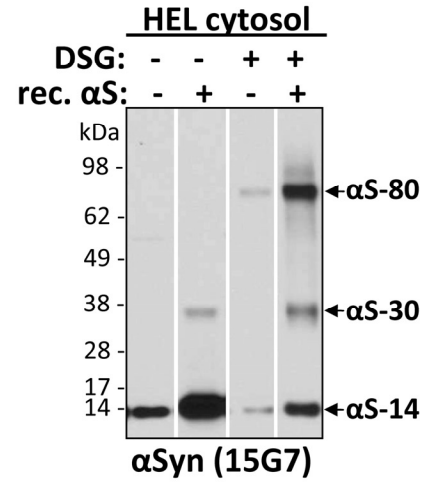**C**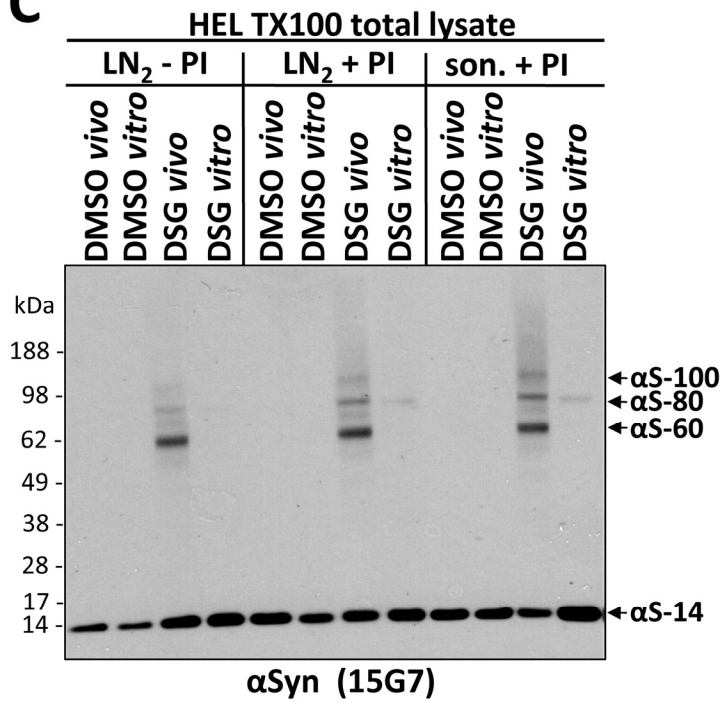**Fig. S3**

**Supplementary Table 1 (Table S1)**

| <b>Suggested <math>\alpha</math>Syn interactor</b> | <b>kDa</b> | <b>Reference</b>               | <b>Presence in crosslinked <math>\alpha</math>Syn oligomers not supported by</b> |
|----------------------------------------------------|------------|--------------------------------|----------------------------------------------------------------------------------|
| HSP-70                                             | 70         | Zhou et al, 2004 (1)           | WB (Fig. 5A); size                                                               |
| $\beta$ -tubulin                                   | 50         | Payton et al, 2001 (2)         | WB (Fig. 1B)                                                                     |
| Parkin                                             | 50         | Shimura et al, 2001 (3)        | WB (Fig. 6A)                                                                     |
| Synaptobrevin-2                                    | 20         | Burré et al, 2011 (4)          | WB (Fig. 6A, B); membr. loc.                                                     |
| Calmodulin                                         | 17         | Lee et al, 2002 (5)            | WB (Fig. S2)                                                                     |
| UCH-L1                                             | 25         | Liu, et al 2002 (6)            | WB (Fig. S2)                                                                     |
| 14-3-3                                             | 30-33      | Ostrerova et al, 1999 (7)      | WB (Fig. S2)                                                                     |
| Synphilin                                          | 130        | Engelender et al, 1999(8)      | size                                                                             |
| MAP1B                                              | > 250      | Jensen et al, 2000 (9)         | size                                                                             |
| PLD2                                               | > 100      | Jenco et al, 1998 (10)0        | size, membrane localization                                                      |
| Dopamine transporter                               | 80         | Torres et al, 2001 (11)        | size, membrane localization                                                      |
| PKC                                                | > 70       | Ostrerova et al, 1999 (7)      | size                                                                             |
| p62                                                | 62         | Kuusito et al, 2001 (12)       | size                                                                             |
| Tyrosine hydroxylase                               | 59         | Nakashima and Ikuta, 1984 (13) | size, tissue expression                                                          |
| ERKs                                               |            | Iwata et al, 2001 (14)         | membrane localization                                                            |
| Rab5A                                              | 26         | Sung et al, 2001 (15)          | membrane localization                                                            |
| Cytochrome-oxidase                                 |            | Elkon et al, 2002 (16)         | membrane localization                                                            |

**Table S1:** Candidate-based exclusion of published  $\alpha$ Syn interactors as components of a potential 60 kDa cytosolic hetero-oligomer; not all proteins shown have actually been proven to physically interact with  $\alpha$ Syn, and some have not been confirmed independently. Among the suggested interactors, cytosolic proteins smaller than ~60 kDa and expected to be expressed in both HEL cells and neurons were analyzed by Western blotting (see Figures 1, 5, 6) or IP/Western blotting (see Fig. S2) for their possible presence in  $\alpha$ S-60 (as well as  $\alpha$ S-80 and  $\alpha$ S-100); others were excluded because of their size, membrane-localization ( $\alpha$ S-60, -80, -100 are cytosolic), or tissue expression. Because of their relative importance in the literature Synaptobrevin-2 and HSP-70 were analyzed despite their membrane-localization (Synaptobrevin-2) or size > 60 kDa (HSP-70), respectively. Abbreviations used: HSP-70, heat-shock 70 kDa protein; MAP1B, microtubule-associated protein 1B; PLD2, phospholipase D2; PKC, protein kinase C; p62, nucleoporin p62 protein; ERKs, extracellular signal-regulated kinases; Rab5a, Ras-related in brain 5a; UCH-L1, Ubiquitin carboxy-terminal hydrolase L1; membr. loc., membrane localization.

## Supplementary Literature

1. Zhou, Y., G. Gu, D.R. Goodlett, T. Zhang, C. Pan, T.J. Montine, K.S. Montine, R.H. Aebersold, and J. Zhang. (2004), *J Biol Chem.* **279**, 39155-64
2. Payton, J.E., R.J. Perrin, D.F. Clayton, and J.M. George. (2001), *Brain Res Mol Brain Res.* **95**, 138-45
3. Shimura, H., M.G. Schlossmacher, N. Hattori, M.P. Frosch, A. Trockenbacher, R. Schneider, Y. Mizuno, K.S. Kosik, and D.J. Selkoe. (2001), *Science.* **293**, 263-9
4. Burre, J., M. Sharma, T. Tsetsenis, V. Buchman, M.R. Etherton, and T.C. Sudhof. (2010), *Science.* **329**, 1663-7
5. Lee, D., S.Y. Lee, E.N. Lee, C.S. Chang, and S.R. Paik. (2002), *J Neurochem.* **82**, 1007-17
6. Liu, Y., L. Fallon, H.A. Lashuel, Z. Liu, and P.T. Lansbury, Jr. (2002), *Cell.* **111**, 209-18
7. Ostrerova, N., L. Petrucelli, M. Farrer, N. Mehta, P. Choi, J. Hardy, and B. Wolozin. (1999), *J Neurosci.* **19**, 5782-91
8. Engelen, S., Z. Kaminsky, X. Guo, A.H. Sharp, R.K. Amaravi, J.J. Kleiderlein, R.L. Margolis, J.C. Troncoso, A.A. Lanahan, P.F. Worley, V.L. Dawson, T.M. Dawson, and C.A. Ross. (1999), *Nat Genet.* **22**, 110-4
9. Jensen, P.H., K. Islam, J. Kenney, M.S. Nielsen, J. Power, and W.P. Gai. (2000), *J Biol Chem.* **275**, 21500-7
10. Jenco, J.M., A. Rawlingson, B. Daniels, and A.J. Morris. (1998), *Biochemistry.* **37**, 4901-9
11. Torres, G.E., W.D. Yao, A.R. Mohn, H. Quan, K.M. Kim, A.I. Levey, J. Staudinger, and M.G. Caron. (2001), *Neuron.* **30**, 121-34
12. Kuusisto, E., L. Parkkinen, and I. Alafuzoff. (2003), *J Neuropathol Exp Neurol.* **62**, 1241-53
13. Nakashima, S. and F. Ikuta. (1984), *J Neurol Sci.* **66**, 91-6
14. Iwata, A., M. Maruyama, I. Kanazawa, and N. Nukina. (2001), *J Biol Chem.* **276**, 45320-9
15. Sung, J.Y., J. Kim, S.R. Paik, J.H. Park, Y.S. Ahn, and K.C. Chung. (2001), *J Biol Chem.* **276**, 27441-8
16. Elkon, H., J. Don, E. Melamed, I. Ziv, A. Shirvan, and D. Offen. (2002), *J Mol Neurosci.* **18**, 229-38
